# Supplementary material for: An integrated microfluidic chip for alginate microsphere generation and 3D cell culture
Source: Royal Society of Chemistry journal article supplement (doi:10.1039/d1ay01820e), 2022-01-01
Supplement: d1ay01820e1.pdf [file d1ay01820e1.pdf]

## **Supporting Information**

### **An integrated microfluidic chip for alginate microspheres generation and 3D cell culture**

Xiaoxiang Zhou<sup>1</sup>, Libo Zhu<sup>1</sup>, Weihao Li<sup>1</sup> and Qunjun Liu<sup>1\*</sup>

<sup>1</sup> State Key Laboratory of Bioelectronics, School of Biological Science and Medical Engineering, Southeast University, No. 2, Sipailou, Nanjing 210096, People's Republic of China.

\* Corresponding author

E-mail: lqj@seu.edu.cn. Phone: 025-83793283 (Q.L.).

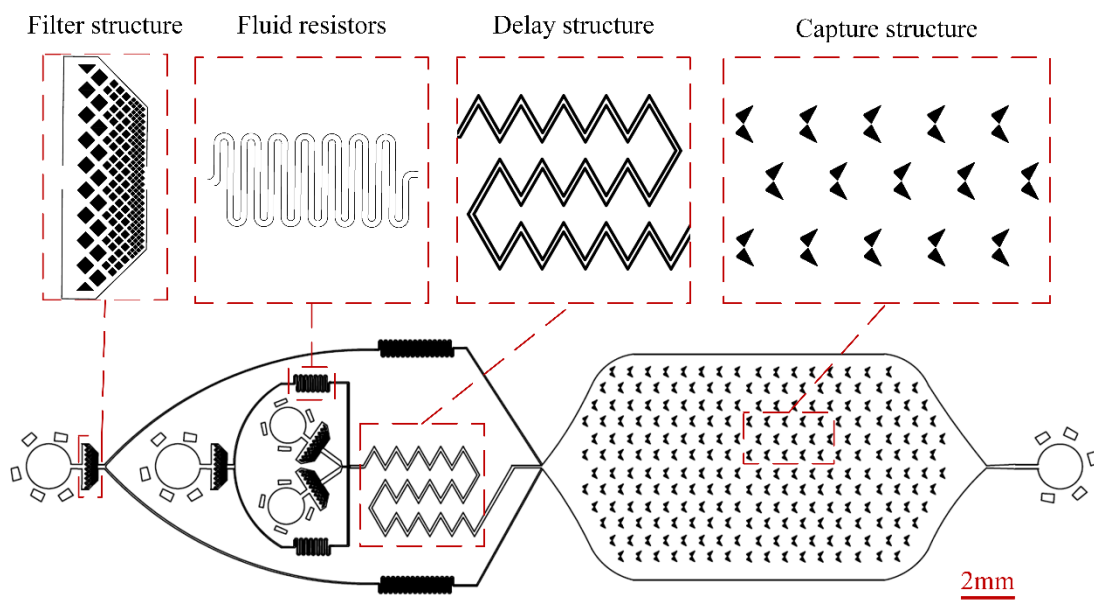

Fig S1. Design of microfluidic system.

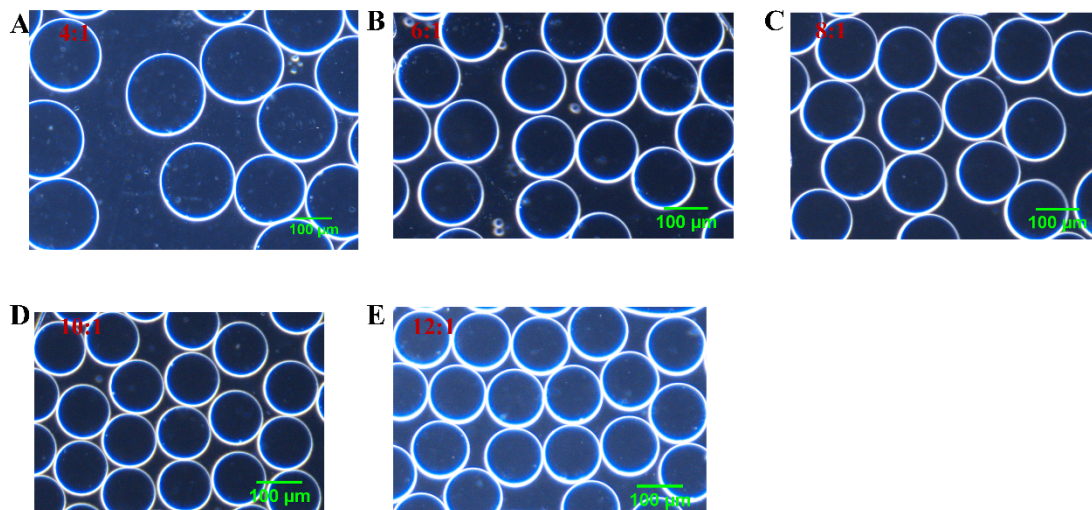

Fig S2. Images of alginate droplets at (A) Foil/Falg = 4, (B) Foil/Falg = 6, (C) Foil/Falg = 8, (D)

Foil/Falg = 10 and (E) Foil/Falg = 12. Falg = 30  $\mu\text{L h}^{-1}$ . Scale bar is 100  $\mu\text{m}$ .

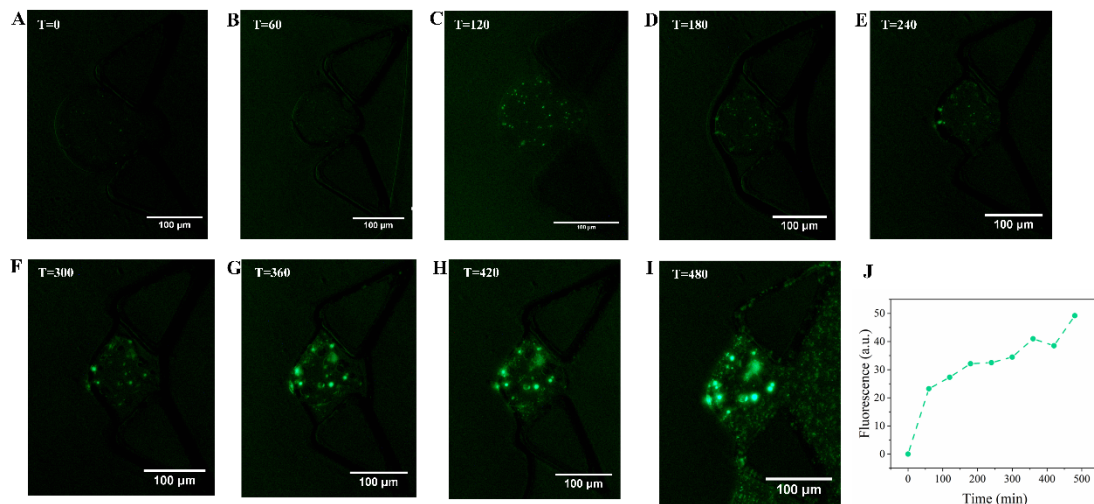

**Fig S3. Complete time-lapse image series of the individual alginate microsphere shown in Figure 4 of the main manuscript. *E. coli* were encapsulated and incubated for 8 h. Scale bar = 100 μm.**
